# Supplementary material
Source: PubMed Central journal article supplement (PMC3511984)
Supplement: mmc1.pdf [file mmc1.pdf]

The American Journal of Human Genetics, 91

**Supplemental Data**

**Genome-wide Association and Population Genetic  
Analysis of C-Reactive Protein in African American  
and Hispanic American Women**

Alex P. Reiner, Sandra Beleza, Nora Franceschini, Paul L. Auer, Jennifer G. Robinson, Charles Kooperberg, Ulrike Peters, and Hua Tang

**African Americans**

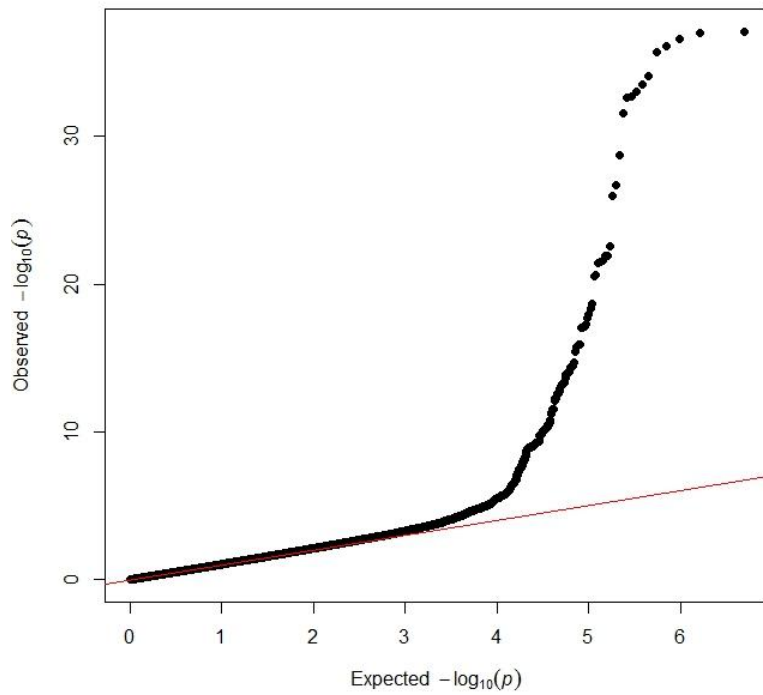

**Hispanic Americans**

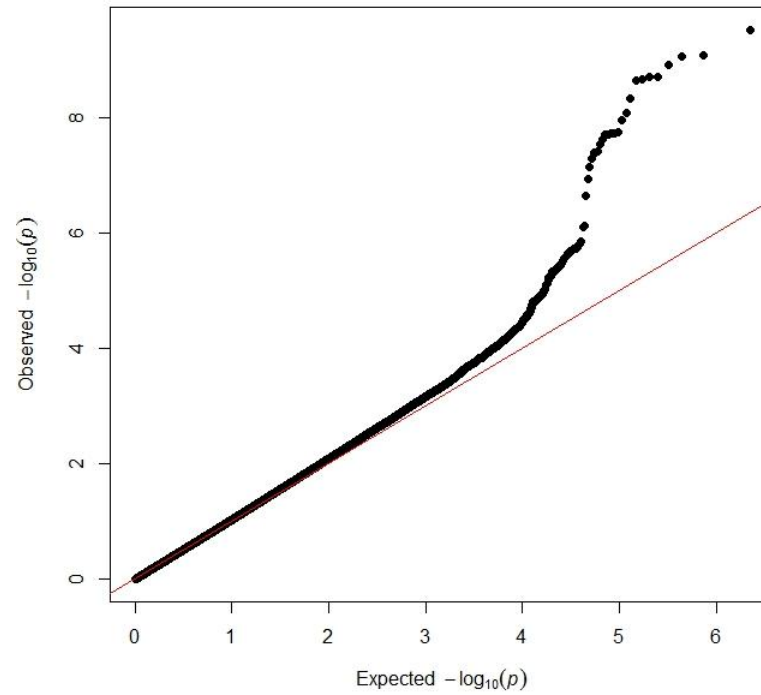

**Figure S1. QQ Plot for Association of CRP in African Americans and Hispanic Americans**

The inflation factors ( $\lambda_{GC}$ ) were 1.053 for African Americans and 1.036 for Hispanic Americans, suggesting that the genome-wide association results were not markedly inflated by population stratification or other confounding factors.

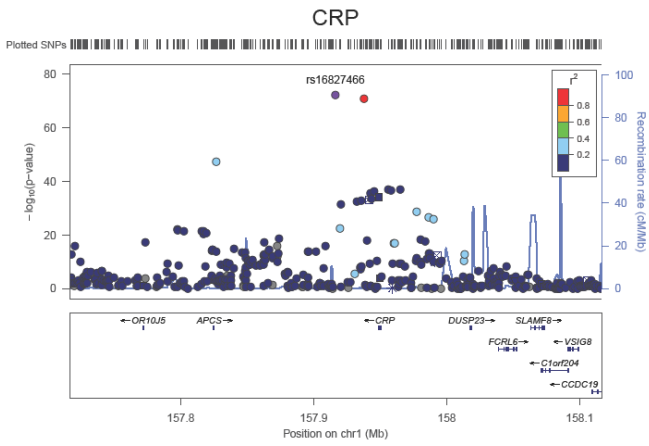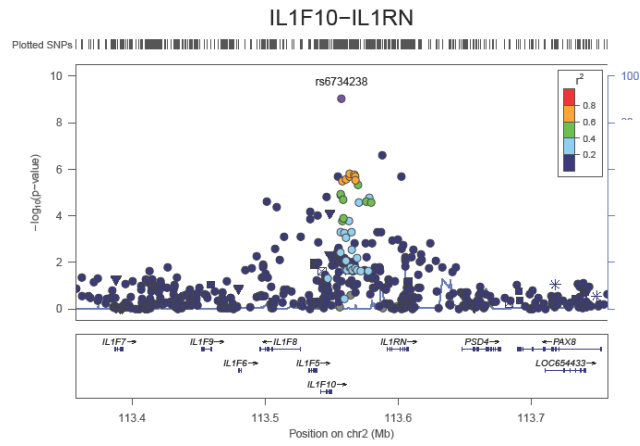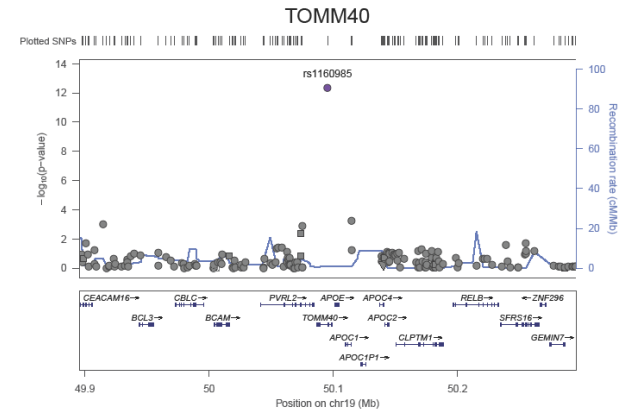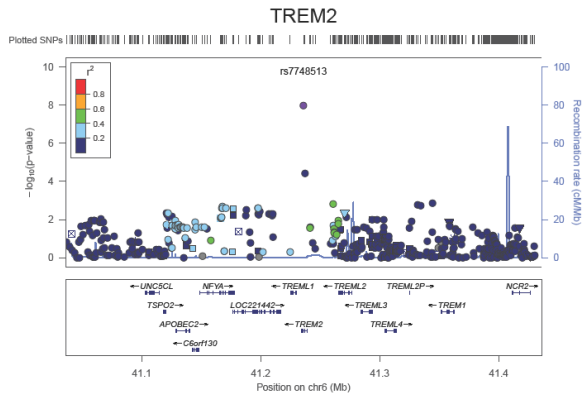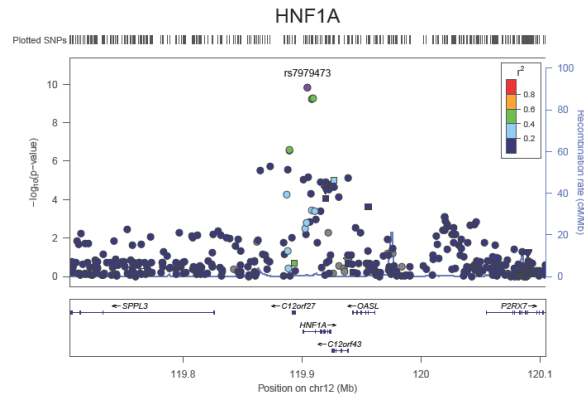

**Figure S2. LD Regional Association Plots for CRP in African Americans**

Shown are regional association plots generated using LocusZoom for the genome-wide significant regions (*CRP*, *IL1F10-IL1RN*, *TREM2*, *HNF1A*, and *TOMM40*). The index SNP in region is shown in purple. The color of the remaining SNPs indicates the level of pair-wise linkage disequilibrium (LD) based on  $r$ -squared relative to the index SNP.  $r$ -squared values were calculated from HapMap2 YRI. SNPs with missing LD information are shown in grey.

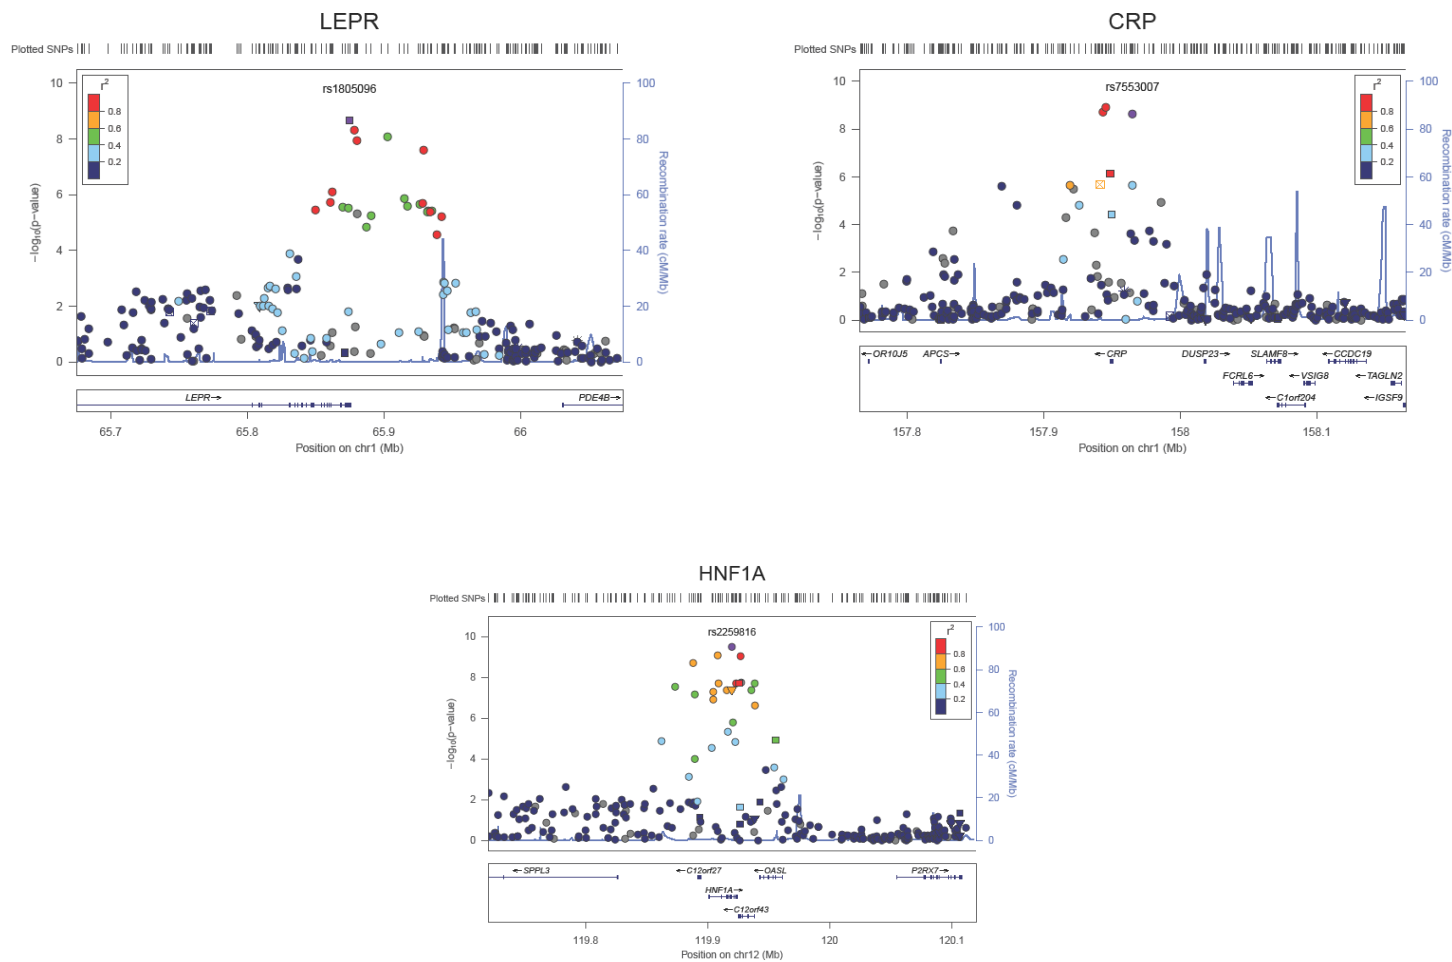

**Figure S3. LD Regional Association Plots for CRP in Hispanic Americans**

Shown are regional association plots generated using LocusZoom for the genome-wide significant regions (*LEPR*, *CRP*, and *HNF1A*). The index SNP in region is shown in purple. The color of the remaining SNPs indicates the level of pair-wise linkage disequilibrium (LD) based on r-squared relative to the index SNP. r-squared values were calculated from HapMap2 CEU. SNPs with missing LD information are shown in grey.

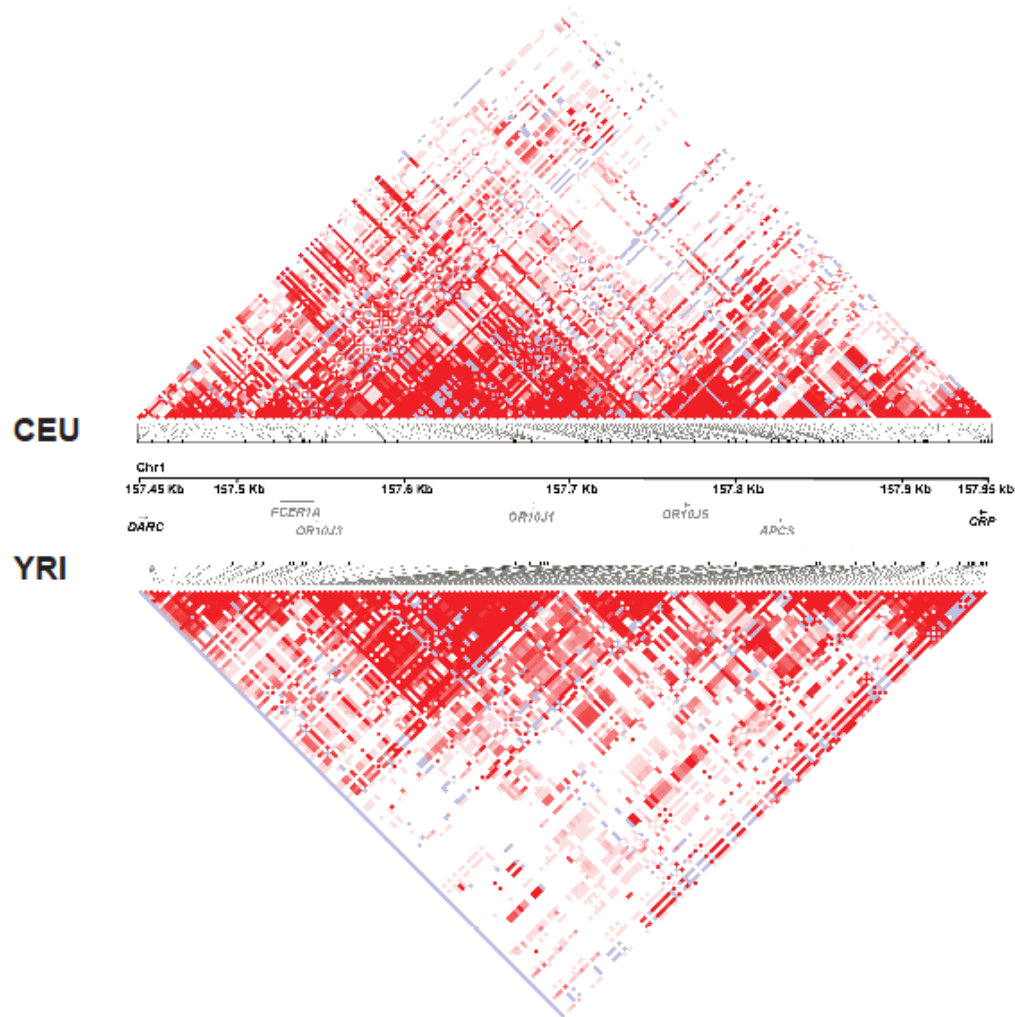

**Figure S4. Comparison of Linkage Disequilibrium (LD) between HapMap Populations in the Region of *CRP* and *DARC***

LD plots based on pair-wise r-squared between SNPs were generated separately for CEU and YRI using Haploview.

**Table S1. Transferability of Previously Identified European and Asian CRP Loci to African American and Hispanic American Women in WHI-SHARE**

| Discovery Population [Ref.] | Chromosome | Locus          | Lead SNP   | Original GWAS (in EA or Asians) |      |                | WHI-SHARE African Americans |                                         | WHI-SHARE Hispanics |                                         |
|-----------------------------|------------|----------------|------------|---------------------------------|------|----------------|-----------------------------|-----------------------------------------|---------------------|-----------------------------------------|
|                             |            |                |            | Effect Allele                   | EAF  | Beta (SE)      | EAF                         | BETA ± SE (P-value)                     | EAF                 | BETA ± SE (P-value)                     |
| European [12]               | 1q23.2     | <i>CRP</i>     | rs2794520  | T                               | 0.34 | -0.160 (0.006) | 0.22                        | -0.275 ± 0.021 (3.8x10 <sup>-37</sup> ) | 0.35                | -0.158 ± 0.026 (1.2x10 <sup>-9</sup> )  |
| European [15]               | 19q13.32   | <i>APOC1</i>   | rs4420638  | G                               | 0.20 | -0.236 (0.009) | 0.20                        | -0.045 ± 0.023 (0.047)                  | 0.19                | -0.171 ± 0.040 (1.8x10 <sup>-5</sup> )  |
| European [15]               | 12q24.31   | <i>HNF1A</i>   | rs1183910  | T                               | 0.33 | -0.149 (0.006) | 0.13                        | -0.119 ± 0.026 (6.5x10 <sup>-6</sup> )  | NA                  | NA                                      |
| European [15]               | 1p31.3     | <i>LEPR</i>    | rs4420065  | T                               | 0.39 | -0.090 (0.005) | 0.41                        | -0.079 ± 0.019 (2.7x10 <sup>-5</sup> )  | 0.44                | -0.145 (0.026) (2.6x10 <sup>-5</sup> )  |
| European [15]               | 1q21.3     | <i>IL6R</i>    | rs4129267  | T                               | 0.40 | -0.079 (0.005) | 0.15                        | -0.110 ± 0.025 (1.8x10 <sup>-5</sup> )  | 0.48                | -0.087 ± 0.025 (4.3x10 <sup>-4</sup> )  |
| European [15]               | 2q13       | <i>GCKR</i>    | rs1260326  | T                               | 0.41 | 0.072 (0.005)  | 0.17                        | 0.058 ± 0.025 (0.019)                   | 0.36                | 0.098 ± 0.026 (2.0x10 <sup>-4</sup> )   |
| European [15]               | 1q44       | <i>NLRP3</i>   | rs12239046 | T                               | 0.39 | -0.047 (0.006) | 0.50                        | -0.050 ± 0.018 (0.0047)                 | 0.38                | -0.055 ± 0.025 (0.031)                  |
| European [15]               | 2p23.3     | <i>IL1F10</i>  | rs6734238  | G                               | 0.42 | 0.050 (0.006)  | 0.44                        | 0.108 ± 0.018 (1.4 x10 <sup>-9</sup> )  | 0.36                | 0.065 ± 0.026 (0.0097)                  |
| European [15]               | 8p23.1     | <i>PPP1R3B</i> | rs9987289  | A                               | 0.10 | -0.069 (0.011) | 0.19                        | -0.094 ± 0.024 (8.3 x10 <sup>-5</sup> ) | NA                  | NA                                      |
| European [15]               | 12q23.2    | <i>ASCL1</i>   | rs10745954 | A                               | 0.50 | 0.039 (0.006)  | 0.22                        | 0.049 ± 0.022 (0.027)                   | NA                  | NA                                      |
| European [15]               | 20q13.12   | <i>HNF4A</i>   | rs1800961  | T                               | 0.05 | -0.088 (0.015) | 0.008                       | -0.248 ± 0.100 (0.013)                  | 0.04                | -0.268 ± 0.061 (7.7 x10 <sup>-6</sup> ) |
| European [15]               | 15q22.2    | <i>RORA</i>    | rs340029   | C                               | 0.38 | -0.032 (0.006) | 0.18                        | -0.021 ± 0.024 (0.38)                   | 0.37                | -0.033 ± 0.026 (0.18)                   |
| European [15]               | 16q12.1    | <i>SALL1</i>   | rs10521222 | T                               | 0.06 | -0.104 (0.015) | NA                          | NA                                      | 0.03                | -0.224 ± 0.108 (0.039)                  |
| European [15]               | 1p32.4     | <i>PABPC4</i>  | rs12037222 | A                               | 0.24 | 0.045 (0.007)  | NA                          | NA                                      | NA                  | NA                                      |
| European [15]               | 7q11.23    | <i>BCL7B</i>   | rs13233571 | T                               | 0.14 | -0.054 (0.009) | 0.05                        | -0.079 ± 0.041 (0.057)                  | 0.07                | -0.038 ± 0.048 (0.43)                   |
| European [15]               | 21q22.2    | <i>PSMG1</i>   | rs2836878  | A                               | 0.28 | -0.032 (0.006) | 0.12                        | -0.129 ± 0.041 (0.0017)                 | 0.26                | -0.055 ± 0.032 (0.089)                  |
| European [15]               | 14q24.2    | <i>RGS6</i>    | rs4903031  | G                               | 0.21 | 0.032 (0.007)  | 0.15                        | 0.007 ± 0.029 (0.81)                    | 0.20                | 0.053 ± 0.032 (0.095)                   |
| Japanese                    | 7p15       | <i>IL6</i>     | rs2097677  | A                               | 0.19 | 0.101 (0.015)  | 0.20                        | 0.0124 ± 0.022 (0.58)                   | NA                  | NA                                      |

EAF = effect allele frequency. EA = European Americans.

Genomic positions and annotations are given using NCBI build 36.1. Effect allele is always on the forward strand. Effect size (BETA) and standard error (SE) are given a natural log-transformed CRP. NA indicates genotype data not available due to QC or imputation failure.

Based on the number of SNPs tested, the Bonferroni-corrected significance threshold is  $P < 0.0028$ .
